# Supplementary material for: Mortality of early treatment for radiation-induced brain necrosis in head and neck cancer survivors: A multicentre, retrospective, registry-based cohort study
Source: PubMed Central journal article supplement — eClinicalMedicine. 2022 Aug 12;52:101618. doi: 10.1016/j.eclinm.2022.101618 (PMC9399256; doi:10.1016/j.eclinm.2022.101618), 2022-08-12
Supplement: mmc1.pdf [file mmc1.pdf]

**Mortality of early treatment for radiation-induced brain necrosis in head and neck cancer survivors: a multicentre, retrospective, registry-based cohort study**

DP<sup>#</sup>, XR<sup>#</sup>, DC<sup>#</sup>, JJ, WTN, HM, YL, HL, JCa, JCh, YX, MC, CS, SL, YT\*

**Supplementary material**

eText: Supplementary statistical methods.....2

Table S1. Baseline characteristics of 229 patients excluded from the primary analysis.....4

Table S2. The Cox model for estimating the effect of early treatment on the primary outcome.....5

Table S3. Multivariable Cox regression analyses performed in each imputed dataset. ....6

Table S4. The logistic regression model for the estimates of individual propensities for receiving early treatment in the first imputed dataset. ....7

Table S5. The standardized mean differences before and after stabilized IPTW based on propensity-score in the first imputed dataset. ....8

Table S6. The standardized mean differences before and after 1:1 propensity-score matching in the first imputed dataset. ....9

Table S7. Hazard ratios and their 95% CIs from propensity-score analyses in each imputed dataset.....10

Figure S1. The unadjusted Kaplan-Meier curve for post-RN survival. ....11

Figure S2. The plot of Schoenfeld residuals. ....12

Figure S3. The propensity-score distribution before and after matching in the first imputed database.....13

Figure S4. The comparison of bevacizumab vs corticosteroids on post-RN survival.....14

Figure S5. Exploratory analysis of overall survival from the commencement of RT.....15

**eText: Supplementary statistical methods.**

We hypothesized that early medical treatment would reduce the risk of all-cause death for patients with RN. Since we had observed that about two-thirds of patients would receive early treatment in real-world clinical practice, in order to achieve 80% power to detect hazard ratio for the primary outcome of 0.80 using a log-rank test with a two-sided significance level of 0.05, we estimated that 706 patients in a 2:1 ratio (471 patients in the early treatment group, 235 patients in the watch-and-wait group) would be needed. Furthermore, we assumed approximately 20% of patients might need to be excluded in accordance with our inclusion criteria or for lack of follow-up information. Thus, we assumed that at least 848 patients would be needed to be screened. Sample size calculations were performed using PASS software (Version 15.0, NCSS LLC., Kaysville, U.T., USA).

In the primary analysis, “survival” and “survminer” packages were used to perform Cox proportional hazards regression analyses by calling the `coxph()` function, and to construct the Kaplan-Meier curve and multivariable-adjusted survival curve by calling `survfit()`, `ggsurvplot()` and `ggadjustedcurves()` functions. Since we had performed multiple imputations to handle missing values, the `with()` function in the "MICE" package was useful for simplifying calls to the model function. Lastly, we pooled the results of 20 imputed datasets in the main analysis, by calling the `pool()` function. All relevant variables have been used to estimate missing values, including demographic features, medical history, and laboratory results as well as outcomes.

In the propensity-score analyses, the `pscore()` function in the “nonrandom” package was used to estimate the individual propensity score using a logistic regression model, and `ps.match()` function was used to create a 1:1 matched dataset, in which treated and controlled observations had similar propensity score, with “nearest-neighbor method” and a 0.05 caliper size (i.e., the maximum distance of propensity

score between treated and controlled observations). The calculation of stabilized weights in the early treatment group:  $W_t = P_t / ps$ ; in the watch-and-wait group:  $W_o = (1 - P_t) / (1 - ps)$ ; “ $P_t$ ” was the proportion of patients receiving early treatment, and “ $ps$ ” was the individual propensity score.

In the secondary analysis, we used `cuminc()` and `crr()` functions in “`cmprsk`” package to construct univariable and multivariable competing risk regression models, respectively. All statistical tests were two-tailed, and p-values  $< 0.05$  were considered significant.

All statistical analyses were performed using R software (Version 4.0.3, R Core Team) for MacOS.

**Table S1. Baseline characteristics of 229 patients excluded from the primary analysis.**

| Characteristics                                                           | Ineligible patients          | Eligible patients            |
|---------------------------------------------------------------------------|------------------------------|------------------------------|
| <i>n</i>                                                                  | 229                          | 641                          |
| Sex – no. (%)                                                             |                              |                              |
| Females                                                                   | 53 (23.1%)                   | 167 (26.1%)                  |
| Males                                                                     | 176 (76.9%)                  | 474 (73.9%)                  |
| Age – years, median (IQR)                                                 | 51.6 (44.3-59.1)             | 51.2 (44.6-58.3)             |
| Symptomatic at diagnosis – no. (%)                                        | 162 (70.7%)                  | 400 (62.4%)                  |
| Co-existing disorders – no. (%)                                           |                              |                              |
| Hypertension                                                              | 32 (14.0%)                   | 83 (12.9%)                   |
| Ischemic or hemorrhagic stroke                                            | 3 (1.3%)                     | 38 (5.9%)                    |
| Diabetes                                                                  | 8 (3.5%)                     | 25 (3.9%)                    |
| Cigarette smoking                                                         | 33 (14.4%)                   | 81 (12.6%)                   |
| Alcohol consumption                                                       | 20 (8.7%)                    | 35 (5.5%)                    |
| Radiotherapy features                                                     |                              |                              |
| Time from the commencement of RT to diagnosis of RN – years, median (IQR) | 4.8 (3.5-7.9); <i>n</i> =138 | 3.7 (2.6-6.4); <i>n</i> =432 |
| TNM stage – no. (%)                                                       |                              |                              |
| I                                                                         | 2/131 (1.5%)                 | 7/432 (1.6%)                 |
| II                                                                        | 24/131 (18.3%)               | 47/432 (10.9%)               |
| III                                                                       | 47/131 (35.9%)               | 208/432 (48.1%)              |
| IV                                                                        | 58/131 (44.3%)               | 170/432 (39.4%)              |
| RT techniques – with iMRT, no. (%)                                        | 55 (40.1%); <i>n</i> =137    | 193 (44.7%); <i>n</i> =432   |
| Nose dose-Gy, mean (SD)                                                   | 67.7 (12.3); <i>n</i> =134   | 69.7 (6.3); <i>n</i> =431    |
| Neck dose-Gy, mean (SD)                                                   | 53.8 (21.3); <i>n</i> =134   | 57.7 (17.3); <i>n</i> =431   |
| Received chemotherapy – no. (%)                                           | 94 (68.1%); <i>n</i> =138    | 339 (78.5%); <i>n</i> =432   |
| Brain MRI findings – no. (%)                                              |                              |                              |
| Bilateral lesions                                                         | 108 (47.2%)                  | 377 (58.8%)                  |
| Involving ≥ 2 brain regions                                               | 62 (27.1%)                   | 89 (13.9%)                   |
| With brain stem lesions                                                   | 4 (1.8%)                     | 20 (3.1%)                    |
| All-cause death – no. (%)                                                 | 73 (31.9%)                   | 112 (17.5%)                  |
| Causes-specific death – no. (%)                                           |                              |                              |
| Cancer-specific death                                                     | 24 (10.5%)                   | 40 (6.2%)                    |
| RT complications-related death                                            | 24 (10.5%)                   | 43 (6.7%)                    |
| Others                                                                    | 25 (10.9%)                   | 29 (4.5%)                    |

Abbreviations: no., Numbers; SD, Standard Deviation; IQR, Interquartile Range; RN, Radiation-induced brain necrosis; RT, Radiotherapy; iMRT, Intensity-modulated radiation therapy; MRI, Magnetic resonance imaging.

**Table S2. The Cox model for estimating the effect of early treatment on the primary outcome.**

|                                          | Estimates | Std. Error | p values |
|------------------------------------------|-----------|------------|----------|
| Early treatment (studied exposure)       | -0.728    | 0.235      | 0.0027   |
| Sex (male)                               | 0.381     | 0.262      | 0.15     |
| Age (years)                              | 0.044     | 0.011      | 0.00027  |
| Symptomatic at diagnosis                 | -0.126    | 0.218      | 0.56     |
| History of stroke                        | 0.241     | 0.397      | 0.55     |
| Bilateral lesions                        | 0.717     | 0.239      | 0.0035   |
| Lesions involving $\geq 2$ brain regions | 0.505     | 0.270      | 0.065    |
| With brain stem lesions                  | 0.573     | 0.541      | 0.30     |
| RT technique (iMRT)                      | -0.468    | 0.315      | 0.14     |
| Time from RT to RN (years)               | 0.013     | 0.042      | 0.76     |
| Having Received chemotherapy             | -0.261    | 0.372      | 0.49     |
| Nose RT dose (Gy)                        | -0.008    | 0.018      | 0.65     |
| Neck RT dose (Gy)                        | -0.008    | 0.012      | 0.52     |
| TNM stage                                |           |            |          |
| I (Reference)                            | ..        | ..         | ..       |
| II                                       | 0.726     | 0.651      | 0.28     |
| III                                      | 0.848     | 0.662      | 0.21     |
| IV                                       | 1.188     | 0.688      | 0.097    |

**Table S3. Multivariable Cox regression analyses performed in each imputed dataset.**

|               | <b>Dataset 1</b>      | <b>Dataset 2</b>  | <b>Dataset 3</b>  | <b>Dataset 4</b>  | <b>Dataset 5</b>  |
|---------------|-----------------------|-------------------|-------------------|-------------------|-------------------|
| Hazard ratios | 0.48                  | 0.53              | 0.42              | 0.52              | 0.45              |
| 95% CIs       | 0.31-0.74             | 0.34-0.82         | 0.26-0.66         | 0.34-0.82         | 0.29-0.71         |
| p values      | 0.00090               | 0.0050            | 0.00018           | 0.0041            | 0.00050           |
|               | <b>Dataset 6</b>      | <b>Dataset 7</b>  | <b>Dataset 8</b>  | <b>Dataset 9</b>  | <b>Dataset 10</b> |
| Hazard ratios | 0.48                  | 0.45              | 0.49              | 0.45              | 0.48              |
| 95% CIs       | 0.31-0.75             | 0.29-0.70         | 0.31-0.75         | 0.29-0.70         | 0.31-0.74         |
| p values      | 0.0010                | 0.00039           | 0.0013            | 0.00039           | 0.00099           |
|               | <b>Dataset 11</b>     | <b>Dataset 12</b> | <b>Dataset 13</b> | <b>Dataset 14</b> | <b>Dataset 15</b> |
| Hazard ratios | 0.49                  | 0.49              | 0.51              | 0.46              | 0.51              |
| 95% CIs       | 0.31-0.77             | 0.31-0.77         | 0.32-0.81         | 0.29-0.72         | 0.33-0.78         |
| p values      | 0.0019                | 0.0019            | 0.0039            | 0.00062           | 0.0022            |
|               | <b>Dataset 16</b>     | <b>Dataset 17</b> | <b>Dataset 18</b> | <b>Dataset 19</b> | <b>Dataset 20</b> |
| Hazard ratios | 0.49                  | 0.53              | 0.47              | 0.51              | 0.47              |
| 95% CIs       | 0.32-0.77             | 0.34-0.83         | 0.30-0.74         | 0.33-0.79         | 0.30-0.74         |
| p values      | 0.0017                | 0.0054            | 0.00090           | 0.0022            | 0.0010            |
|               | <b>Pooled results</b> |                   |                   |                   |                   |
| Hazard ratios | 0.48                  |                   |                   |                   |                   |
| 95% CIs       | 0.30-0.77             |                   |                   |                   |                   |
| p values      | 0.0027                |                   |                   |                   |                   |

**Table S4. The logistic regression model for the estimates of individual propensities for receiving early treatment in the first imputed dataset.**

|                                          | Estimates | Std. Error | p values |
|------------------------------------------|-----------|------------|----------|
| (Intercept)                              | 1.720     | 0.686      | 0.012    |
| Sex (male)                               | -0.244    | 0.213      | 0.25     |
| Age (years)                              | -0.030    | 0.009      | 0.0012   |
| Symptomatic at diagnosis                 | 0.052     | 0.189      | 0.78     |
| History of stroke                        | -0.383    | 0.357      | 0.28     |
| Bilateral lesions                        | 0.326     | 0.194      | 0.092    |
| Lesions involving $\geq 2$ brain regions | 0.451     | 0.312      | 0.149    |
| With brain stem lesions                  | 0.303     | 0.629      | 0.63     |
| RT technique (iMRT)                      | -0.492    | 0.210      | 0.019    |
| Time from RT to RN (years)               | -0.039    | 0.017      | 0.023    |
| Having Received chemotherapy             | 0.078     | 0.228      | 0.73     |
| Nose RT dose (Gy)                        | 0.007     | 0.006      | 0.26     |
| Neck RT dose (Gy)                        | 0.006     | 0.004      | 0.12     |
| TNM stage                                |           |            |          |
| I (Reference)                            | ..        | ..         | ..       |
| II                                       | 0.745     | 0.440      | 0.090    |
| III                                      | 0.355     | 0.387      | 0.36     |
| IV                                       | 0.127     | 0.398      | 0.75     |

**Table S5. The standardized mean differences before and after stabilized IPTW based on propensity-score in the first imputed dataset.**

| Covariates                               | SMD before IPTW | SMD after IPTW |
|------------------------------------------|-----------------|----------------|
| Sex (male)                               | 0.060           | 0.003          |
| Age (years)                              | 0.292           | 0.013          |
| Symptomatic at diagnosis                 | 0.055           | 0.054          |
| History of stroke                        | 0.171           | 0.012          |
| Bilateral lesions                        | 0.239           | 0.022          |
| Lesions involving $\geq 2$ brain regions | 0.190           | 0.034          |
| With brain stem lesions                  | 0.087           | 0.015          |
| RT technique (iMRT)                      | 0.263           | 0.045          |
| Time from RT to RN (years)               | 0.135           | 0.019          |
| Having Received chemotherapy             | 0.012           | 0.019          |
| Nose RT dose (Gy)                        | 0.119           | 0.033          |
| Neck RT dose (Gy)                        | 0.161           | 0.037          |
| TNM stage                                | 0.182           | 0.022          |



**Table S6. The standardized mean differences before and after 1:1 propensity-score matching in the first imputed dataset.**

| Covariates                               | SMD before PSM | SMD after PSM |
|------------------------------------------|----------------|---------------|
| Sex (male)                               | 0.059          | 0.065         |
| Age (years)                              | 0.317          | 0.040         |
| Symptomatic at diagnosis                 | 0.055          | 0.036         |
| History of stroke                        | 0.204          | 0.027         |
| Bilateral lesions                        | 0.241          | 0.119         |
| Lesions involving $\geq 2$ brain regions | 0.172          | 0.016         |
| With brain stem lesions                  | 0.078          | 0.000         |
| RT technique (iMRT)                      | 0.266          | 0.035         |
| Time from RT to RN (years)               | 0.163          | 0.083         |
| Having Received chemotherapy             | 0.012          | 0.048         |
| Nose RT dose (Gy)                        | 0.127          | 0.053         |
| Neck RT dose (Gy)                        | 0.172          | 0.082         |
| TNM stage                                | 0.114          | 0.050         |

**Table S7. Hazard ratios and their 95% CIs from propensity-score analyses in each imputed dataset.**

|                                            | <b>Dataset 1</b>  | <b>Dataset 2</b>  | <b>Dataset 3</b>  | <b>Dataset 4</b>  | <b>Dataset 5</b>  |
|--------------------------------------------|-------------------|-------------------|-------------------|-------------------|-------------------|
| Stabilized IPTW                            | 0.52 (0.35-0.79)  | 0.62 (0.40-0.94)  | 0.55 (0.36-0.84)  | 0.56 (0.37-0.85)  | 0.52 (0.34-0.79)  |
| 1:1 matching                               | 0.46 (0.25-0.83)  | 0.51 (0.29-0.90)  | 0.38 (0.21-0.69)  | 0.57 (0.33-0.995) | 0.44 (0.25-0.77)  |
| Additional adjustment for propensity score | 0.48 (0.31-0.74)  | 0.53 (0.34-0.83)  | 0.41 (0.26-0.65)  | 0.52 (0.34-0.82)  | 0.45 (0.29-0.71)  |
|                                            | <b>Dataset 6</b>  | <b>Dataset 7</b>  | <b>Dataset 8</b>  | <b>Dataset 9</b>  | <b>Dataset 10</b> |
| Stabilized IPTW                            | 0.52 (0.34-0.78)  | 0.51 (0.33-0.77)  | 0.54 (0.35-0.81)  | 0.54 (0.35-0.82)  | 0.48 (0.32-0.74)  |
| 1:1 matching                               | 0.50 (0.29-0.85)  | 0.44 (0.25-0.78)  | 0.73 (0.44-1.23)  | 0.36 (0.18-0.66)  | 0.64 (0.37-1.11)  |
| Additional adjustment for propensity score | 0.48 (0.31-0.75)  | 0.45 (0.29-0.70)  | 0.48 (0.31-0.75)  | 0.45 (0.29-0.70)  | 0.48 (0.31-0.75)  |
|                                            | <b>Dataset 11</b> | <b>Dataset 12</b> | <b>Dataset 13</b> | <b>Dataset 14</b> | <b>Dataset 15</b> |
| Stabilized IPTW                            | 0.52 (0.34-0.80)  | 0.49 (0.32-0.74)  | 0.55 (0.36-0.83)  | 0.49 (0.32-0.75)  | 0.51 (0.34-0.78)  |
| 1:1 matching                               | 0.45 (0.26-0.79)  | 0.46 (0.26-0.82)  | 0.50 (0.27-0.91)  | 0.51 (0.28-0.90)  | 0.46 (0.26-0.83)  |
| Additional adjustment for propensity score | 0.49 (0.31-0.77)  | 0.49 (0.31-0.77)  | 0.51 (0.32-0.80)  | 0.46 (0.29-0.72)  | 0.50 (0.32-0.78)  |
|                                            | <b>Dataset 16</b> | <b>Dataset 17</b> | <b>Dataset 18</b> | <b>Dataset 19</b> | <b>Dataset 20</b> |
| Stabilized IPTW                            | 0.47 (0.31-0.72)  | 0.50 (0.33-0.76)  | 0.51 (0.34-0.77)  | 0.55 (0.36-0.83)  | 0.47 (0.31-0.73)  |
| 1:1 matching                               | 0.50 (0.28-0.90)  | 0.55 (0.33-0.93)  | 0.48 (0.28-0.82)  | 0.69 (0.39-1.22)  | 0.55 (0.32-0.94)  |
| Additional adjustment for propensity score | 0.49 (0.32-0.77)  | 0.53 (0.34-0.83)  | 0.47 (0.30-0.73)  | 0.51 (0.33-0.78)  | 0.47 (0.30-0.74)  |

**Figure S1. The unadjusted Kaplan-Meier curve for post-RN survival.**

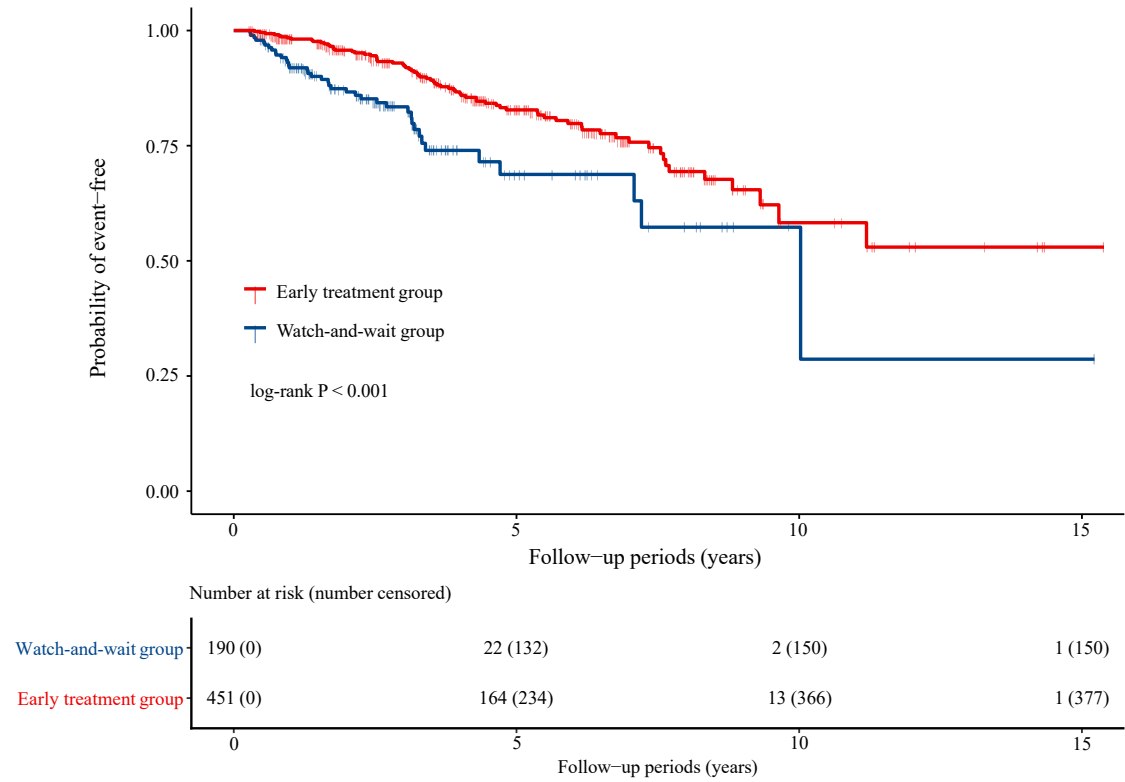

**Figure S2. The plot of Schoenfeld residuals.**

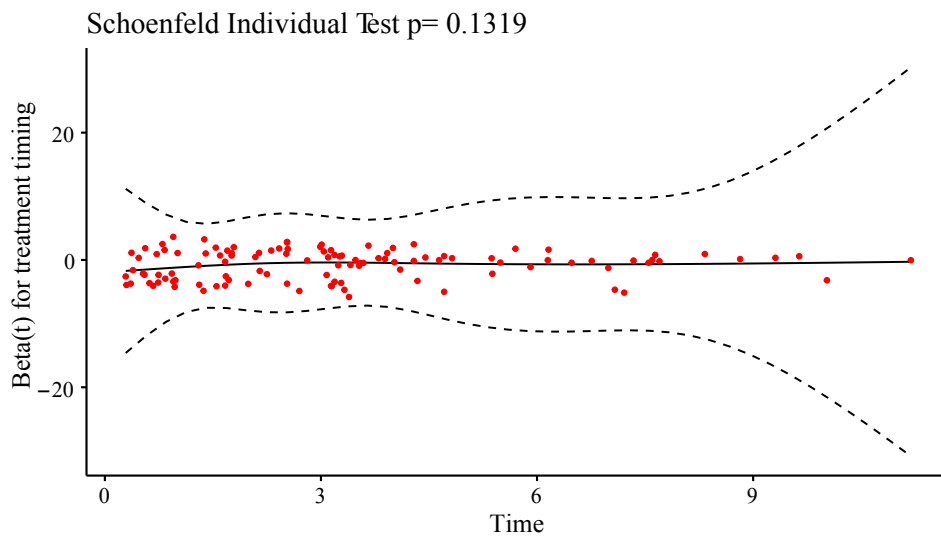

The proportional hazard assumption was not violated, as the hazard ratio did not change over time.

**Figure S3. The propensity-score distribution before and after matching in the first imputed database.**

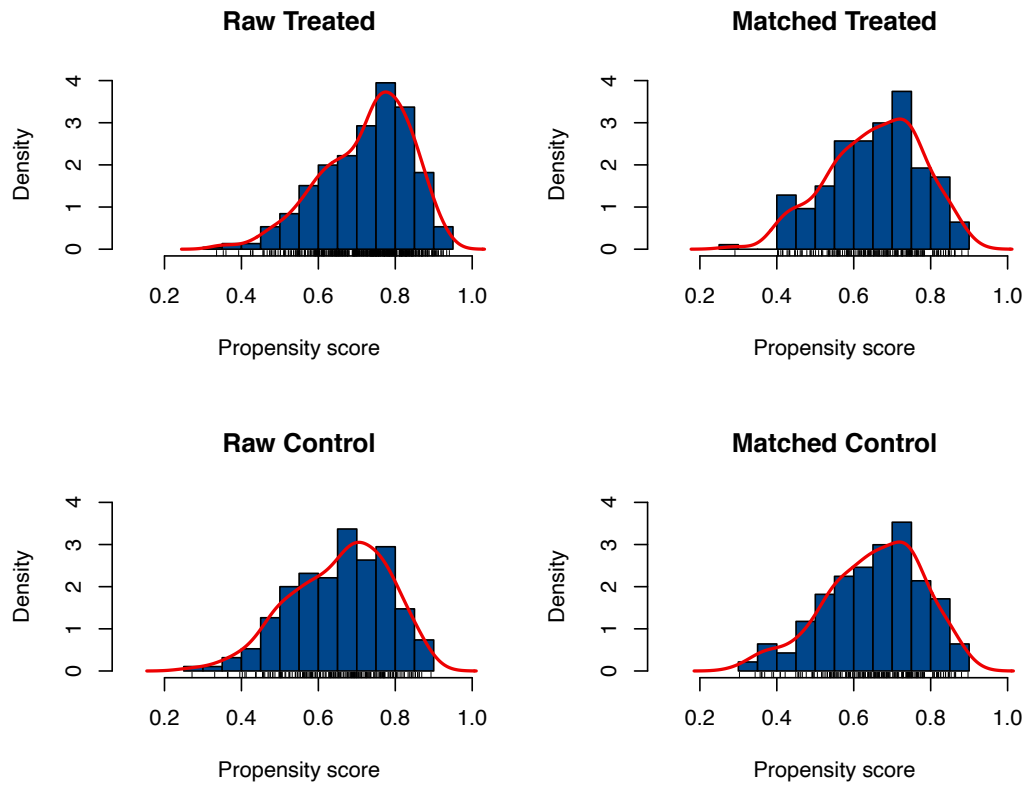

Treated=early treatment group; Control=watch-and-wait group.

**Figure S4. The comparison of bevacizumab vs corticosteroids on post-RN survival.**

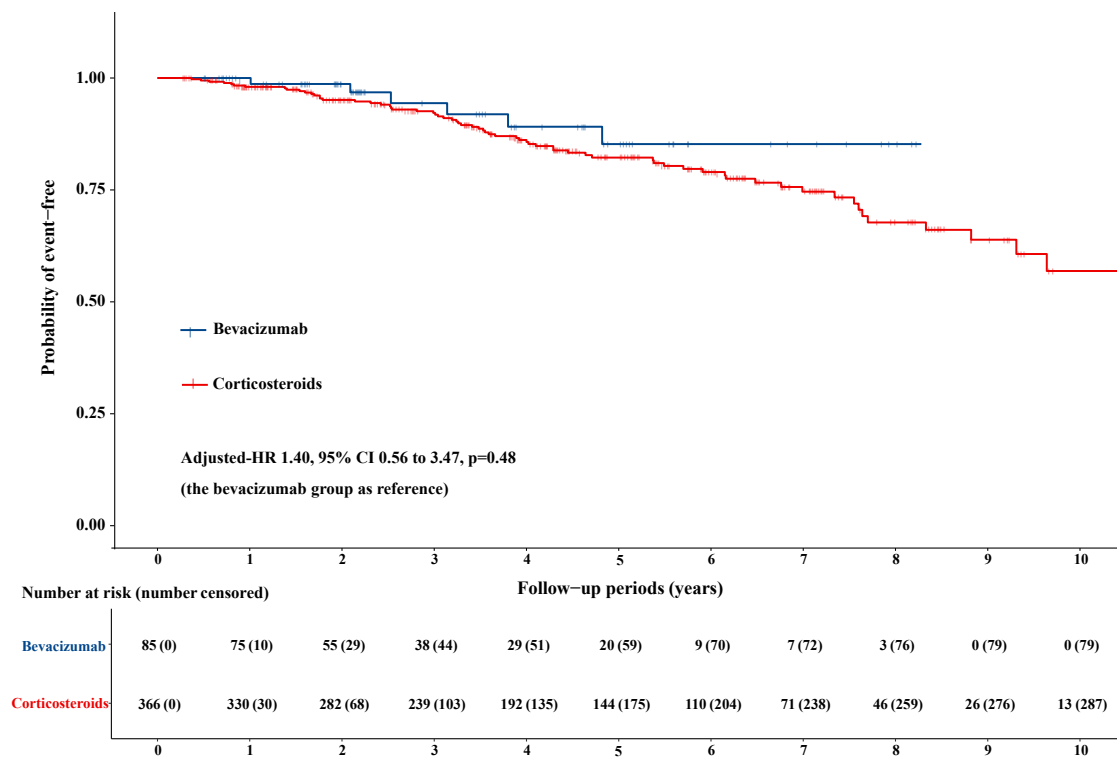

**Figure S5. Exploratory analysis of overall survival from the commencement of RT.**

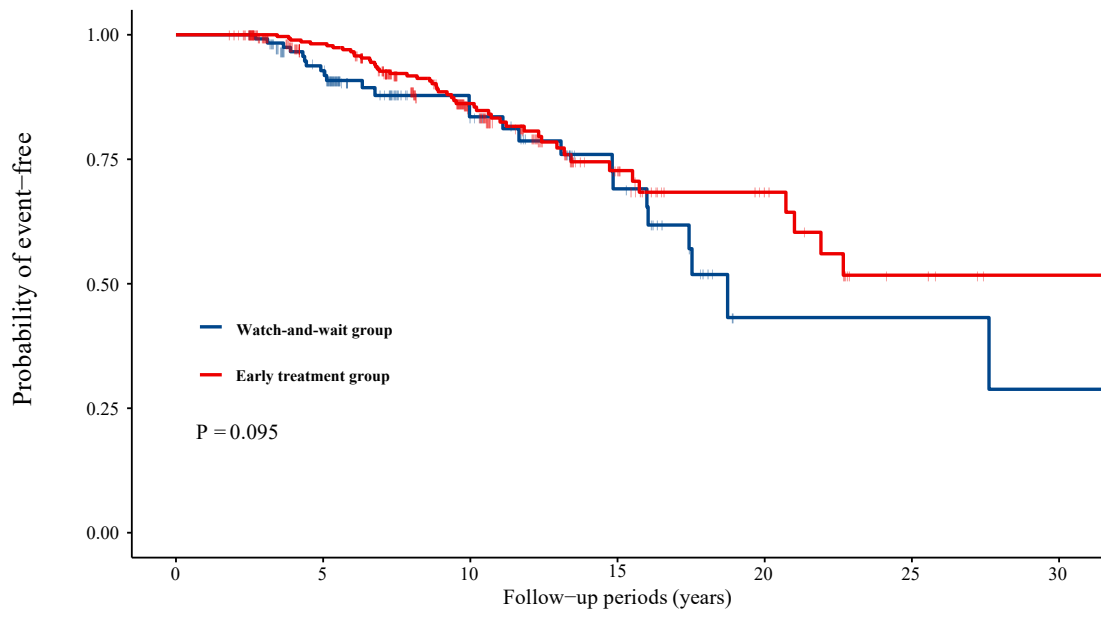

Number at risk (number censored)

|                 |         |          |           |          |          |         |         |
|-----------------|---------|----------|-----------|----------|----------|---------|---------|
| Watch-and-wait  | 121 (0) | 96 (17)  | 39 (68)   | 20 (82)  | 3 (94)   | 3 (94)  | 2 (94)  |
| Early treatment | 311 (0) | 256 (50) | 131 (150) | 40 (230) | 20 (246) | 6 (256) | 2 (260) |

The KM curve displayed below is a sensitivity analysis, in which we only included the sample that there was no missing data (432 patients) and the study baseline was set to the commencement of RT.

The log-rank test showed no statistical significance on mortality of different timing of treatment (log-rank  $p=0.095$ ), while multivariable Cox regression analysis showed that the point estimate of hazard ratio on all-cause mortality were **0.38 (95%CI, 0.21-0.69;  $p=0.001$ )** after adjusting for confounders (as the same covariates in the main analysis), which still favored the choice of early treatment for RN.
